# Supplementary material for: Density-Dependent Plant–Plant Interactions Triggered by Grazing
Source: Front Plant Sci. 2019 Jul 5;10:876. doi: 10.3389/fpls.2019.00876 (PMC6624794; doi:10.3389/fpls.2019.00876)
Supplement: Supplementary file 1 [file Table_1.XLSX]

## Sheet: Cover & No. of flowering shoots
Raw data-set for peer-review process. Kelemen, A. et al. Density-dependent plant-plant interactions triggered by grazing. Frontiers in Plant Science. Appendix S1. Species covers and the numbers of flowering shoots detected in 0.5m × 0.5m plots.
Species:	Life-form	Cover:	Site1/1	Site1/2	Site1/3	Site1/4	Site1/5	Site1/6	Site1/7	Site1/8	Site1/9	Site1/10	Site1/11	Site1/12	Site1/13	Site1/14	Site1/15	Site1/16	Site1/17	Site1/18	Site1/19	Site1/20	Site1/21	Site1/22	Site1/23	Site1/24	Site1/25	Site1/26	Site1/27	Site1/28	Site1/29	Site1/30	Site1/31	Site1/32	Site2/1	Site2/2	Site2/3	Site2/4	Site2/5	Site2/6	Site2/7	Site2/8	Site2/9	Site2/10	Site2/11	Site2/12	Site2/13	Site2/14	Site2/15
Althaea officinalis	H		0	0	0	0	0	0	0	0	20	10	10	15	20	18	20	9	50	50	36	35	40	35	50	27	75	70	78	85	90	80	80	88	0	0	0	0	0	0	0	0	17	10	20	10	13	15	16
Achillea asplenifolia	H		3	0	0	0	0	0	0.5	0	0.5	0	4	0	0	0	0	0	0	1	0	0	6	7	4	0.7	0.3	0	0.3	3	0	0	2	4	0	1	0	0	0	17	18	0	2	0	8	0	0	0	0
Agropyron repens	G		25	30	4	20	40	26	35	15	4	10	15	42	42	10	32	40	16	20	5	4	8	3	40	0	8	50	16	8	24	30	5	6	23	60	20	20	50	7	4	80	14	7	20	50	11	20	10
Agrostis stolonifera	H		0	0	0	0	0	0	0	0	2	0	25	0	0	10	0	0	0	0	0	0	8	1	0	0	0	0	0	0	0	0	0	0	0	0	0	10	0	0	0	0	0	0	5	5	0	0	0
Alopecurus pratensis	H		0	0	0	0	0	0	0	0	0	0	0	0	0	0	0	0	0	0	30	50	0	0	0	7	0	0	0	0	1	0	0	0	0	0	0	0	0	0	0	0	0	5	0	0	20	0	0
Bolboschoenus maritimus	G		0	0	0	0	0	0	0	0	0	0	0	0	0	0	0	0	0	0	0	0	0	0	2	0	0	0	0	0	0	0	0	0	0	0	0	0	0	0	0	0	0	0	0	0	0	0	0
Calystegia sepium	H		0	1	0	0	0	0	0	0	0	0	6	0	0	0	5	0	0	0	0	0	0	0	0	0	0	0	0.5	0	0	0	0	0	0	0	0	0	0	0	0	0	0	0	0	0	4	0	0
Carex acutiformis	H		0	0	0	0	0	0	0	0	0	0	0	0	0	0	0	0	0	0	0	0	0	0	0	0	0	0	0	0	0	0	0	0	0	0	2	15	0	0	0	0	0	0	1	0	0	0	0
Carex distans	H		0	0	0	1.5	6	0	0	0	8	0	0	3	9	0	0	3	0.5	5	2	4	0	3	2	0	0	3	0	0	4	2	0	0	5	4	0	0	1	3	0	0	0	0	0	0	0	3	1
Carex hirta	G		0	3	0	0	0	0	0	0	1	0	7	0	0	0	0	4	0	0	0.5	2	0	0	0	0	1	0	0	2	0	0	0	0	0	0	0	0	0	0	0	0	0	0	0	0	0	0	0
Carex otrubea	H		0	0	0	0	0	0	0	0	0	0	0	0	0	0	0	0	0	0	0	0	0	0	0	0	0	0	0	0	0	0	0	0	0	0	0	0	0	0	0	0	0	0	0	0	0	0	0
Carex tomentosa	G		2	2	0	1	0	1	0	0	0	1	1	0	0	1	0	0	3	0	0	0	0	0	0	0	1	0	0	0	0	0	0	0	3	0	0.5	12	0	0	0.5	0	0	0	0	10	0	30	20
Centaurea jacea	H		0	1	0	0	0.3	5	0	15	11	0	3	0	0	1	0	8	8	0	1	2	3	0.7	0	0	0	0	0	0	0	0	0	0	0	0	0	0	0	0	0	0	1.5	0	0	1	0	15	10
Cichorium intybus	H		0	0	0	0	0	0	0	0	0	0	0	0	0	0	0	0	0	0	0	0	0	0	0	0	0	0	0	0	0	0	0	0	0	0	0	0	0	0	0	0	0	0	0	0	0	0	0
Cirsium arvense	G		0	4	2	9	1.5	0	0	0	1	0	0	0	2	1	4	2	0	0	4	4	0	0	0	4	0	0	0	0	4	0	0	0	2	0	0	0	0	0	0	0	0	0	0	0	0	0	0
Cirsium brachycephalum	H		0	0	0	0	0	0	0	0	0	0	0	0	0	0	0	0	0	0	0	0	0	0	0	0.7	0	0	0	0	0	0	0	0	0	0	0	0	0	0	0	1	0	0	0	12	0	0	0
Cirsium canum	G		6	0	0	0	3	0	0	0	0.7	0	0	0	0	0	0	0	0	0	0	0	0	0	0	0	0	0	0	0	0	0	0	0	0	0	0	0	1	0	0	0	28	8	0	0	0	0	0
Convolvulus arvensis	H		8	0	0	1	0	0	0	0	0	0	0	0	0	0	2	0	0	0	0	0	0	0	0	0	0	0	0	0	0	0	0	0	7	0	0	0	0	0	0	0	0	0	1	0	0	0	0
Conyza canadensis	Th		0	0	0	0	0	0	0	0	0	0	0	0	0	0	0	0	0	0	0	0	0	0	0	0	0	0	0	0	0	0	0	0	0	0	0	0	0	0	0	0	0	0	0	0	0	0	0
Crepis biennis	Th		0	0	0	0	0	0	18	0	0	0	0	0	0	0	0	0	0	4	0	0	0	0	0	0	0	0	0	0	0.7	0	0	0.3	0	0	0.1	0	0	0	0	0	0	0	0	0	0	0	0
Cynodon dactylon	G		0	0	0	0	0	0	0	0	0	0	0	0	0	0	0	0	0	0	0	0	0	0	0	0	0	0	0	0	0	0	10	0	0	0	0	0	0	0	0	0	0	0	0	0	0	0	0
Dactylis glomerata	H		0	0	0	0	0	0	0	20	0	0	0	0	0	0	0	0	0	2	0	0	0	10	0	0	0	0	0	0	0	0	3	0	0	0	18	0	11	4	2	0	10	0	1	0	0	0	0
Daucus carotta	Th-TH		0	0	0	0	0	0	0	0	0	0	0	0	0	0	0	0	0	0	0	0	0	0	0	0	0	0	0	0	0	0	0	0	0	0	0	0	0	0	0	0	0	0	0	0	0	0	0
Desampsia caespitosa	H		0	0	0	0	0	0	0	0	0	0	0	0	0	0	0	0	0	0	0	0	0	0	0	0	3	0	0	0	0	0	0	0	0	0	0	0	0	0	0	0	0	0	0	0	0	0	0
Epilobium tetragonum	H		0	0	0	0	0	0	0	0	0	0	0	0	0	0	0	0	0	0	0	0	0	0	2	0	0	0	0	0	0	0	0	0	0	0	0	0	0	0	0	0	0	0	0	0	0	0	0
Festuca arundinacea	H		0	20	0	0	12	0	0	10	0	30	10	0	0	0	8	0	0	0	0	0	10	15	8	0	0	0	0	0	0	0	0	8	0	0	0	0	0	0	18	0	0	0	0	0	0	0	0
Festuca pratensis	H		4	0	21	10	0	0	0	0	35	0	0	0	0	6	0	0	0	20	0	0	0	0	0	41	0	5	20	0	6	0	3	0	0	0	0	10	3	0	0	0	0	0	0	0	0	5	0
Galium palustre	H		0	0	0.1	0	0	0	0	0	0	0	0	0	0	0	0	0	0	0	0	0	0	0	0	0	0.1	0	0	0	0	0	0	0	0	0	0	0	0	0	0	0	0	0	0	0	0	0	0
Galium verum	H		20	7	22	5	25	20	20	20	15	5	2	15	13	8	20	7	2	0	8	0.5	4	5	0	0	2	7	0	1	0	2	0	0	33	10	12	0	30	32	10	0.2	14	25	10	4	0	0	2
Holoschoenus romanus	G		0	0	0	0	0	0	0	0	0	0	5	0	0	0	0	0	0	0	0	0	0	0	0	0	0	0	0	0	0	0	0	0	0	0	0	0	0	0	0	0	0	0	0	0	0	0	0
Inula britannica	H		0.3	0	0	0	0	0	0	3	0	0	0	0	0	0	0	0	0	0	0	0	0	0	0	0	0	0	0	0	0	0	0	0	0	0	0	0	0	0	0	0	0	0	0	0	0	0	15
Juncus compressus	G		0	0	0	0	0	0	0	0	0	0	0	0	0	0	0	0	0.2	0	0	0	0	0	0	0	0	0	0	0	0	0	0	0	0	0	0	0	0	0	0	0	0	0	0	4	0	0	0
Juncus effusus	H		0	0	0	0	0	0	0	0	0	0	0	0	0	0	0	0	0	0	0	0	0	0	0	0	0	0	0	0	0	0	0	0	0	0	0	0	0	0	0	0	0	0	0	0	0	0	0
Lactuca saligna	Th-TH		0	0	0	0	0	0	0	0	0	0	0	0	0	0	0	0	0	0	0	0	0	0	0	0	0	0	0	0	0	0	0	0	0	2	0	0	0	0	0	0.5	0	0	0	0	0	0	0
Lathyrus pratensis	H		0	0	0	0	0	0	0	0	0	0	0	0	0	0	0	0	0	0	0	0	0	0	0	0	0	0	0	0	0	0	0	0	0	0	0	0	0	0	0	0	0	9	0	0	0	0	0
Lolium perenne	H		0	0	0	0	0	0	0	0	0	0	0	0	0	0	0	0	0	0	0	0	0	0	0	0	0	0	0	0	0	0	0	0	0	0	0	0	0	0	0	0	0	0	0	0	0	0	0
Lotus tenuis	H		0	0	0	0	0	0	0	0	1.5	5	0	0	0	0	0	0	0	0.7	0	0	1	3	0	0	0	0	0	0	0	0	0.3	0	0	0.5	0	0	0	0	0	0	0	0	0	0	0	0	0
Melilotus officinalis	Th		0	0	0	0	0	0	0	0	0	0	0	0	0	0	0	0	0	0	0.3	0	0	0	0	0	0	0	0	0	0	0	0	0	0	0	0	0	0	0	0	0	0	0	0	0	0	0	0
Mentha aquatica	H		0	0	0	0	0	0	0	0	0	0	0	0	0	0	0	0	1	0	0	0	0	0.3	18	2	0	0	0	0	3	6	0	0	0	0	0	0	0	0	0	0	0	0	0	0	0	0	0
Pastinaca sativa	H		2	2	3	20	1	7	4	5	1	1	0.5	2	0	0	0.2	2	0	5	0	0	0	1	0	0	0	3	0	0	0	0	0	0	4	5	3	0	4	9	3	2	4	6	0	0	0	0	0
Phalaris arundinacea	H		0	0	0	0	0	0	0	0	0	0	0	0	0	0	0	0	0	0	0	0	0	0	0	0	0	0	0	0	0	0	0	0	0	0	0	0	0	0	0	0	0	0	0	0	27	0	0
Phleum pratense	H		0	0	0	0	0	0	0	0	0	0	0	0	0	10	0	0	0	0	0	0	0	0	0	0	0	0	0	0	0	0	0	0	0	0	0	0	0	0	0	0	0	0	0	0	0	0	0
Plantago lanceolata	H		0	0	0	0	0	0	0	0	0	0	0	0	0	0	0	2	0	0	0	0	0	0	0	0	0	0	0	0	0	0	0	0	0	0	0	0	0	0	0	0	0	0	0.5	0	0	0	0
Plantago major	H		0	0	0	0	0	0	0	0	0	0	1	0	0	0	0	0	6	0	0	0	0	0	2	0	0	0	0	0	0	3	0	0	0	0	0	0	0	0	0	0	0	0	0	0	0	0	0
Poa angustifolia	H		10	8	50	35	5	10	5	2	7	10	0	1	4	10	3	3	0	15	2	2	8	15	4	1	10	10	0	0	1	1	1	6	5	2	25	5	8	5	20	0	3	0.3	8	0	3	2	4
Poa compressa	H		0	0	0	0	0	0	0	0	0	0	0	0	0	0	0	0	0	0	0	0	0	0	0	0	0	0	0	0	0	0	0	0	0	0	0	0	0	0	0	0	0	0	0	0	0	0	0
Potentilla anserina	H		0	0	0	0	0	0	0	0	0	0	0	0	0	0	0	0	2	0	0	0	0	0	0	0	0	0	0	0	2	0	0	0	0	0	0	0	0	0	0	0	0	0	0	0	0	0	0
Potentilla reptans	H		0	10	2	0	1	0	0	0	0	0	0	2	0	0	3	2	2	0	3	3	0.5	0	3	3	0	0	0	0	4	0	0	0	1.5	5	0.3	10	0	0	0	3	1	3	0	0	2	4	4
Ranunculus polyanthemos	H		0	3	0	0	0	0	0	0	0	0	1	0.3	4	1	0	0	1	0	0	0.3	0	0	0	0	0	0	0.3	0	0	0	0	0	0	0	0	0	0	2	0.3	0	0	0	0	0	0	0	0
Ranunculus repens	H		0	0	0	0	0	0	0	0	0	0	0	0	0	0	0	0	0	0	0	0	0	0	0	0	0	0	0	0	0	2	0	0	0	0	0	0	0	0	0	0	0	0	0	0	0	0	0
Serratula tinctoria	H		0	0	0	1.5	0	12	0	0	7	1	0	10	0	3	0	0	0.5	0	0	0	0	0	0	0	2	8	0	0	0	0	0	0	0	0	0	0	0	0	0	0	0	0	0	0	0	7	0
Silene nutans	H		0	0	0	0	0	0	0	0	0	0	0	0	0	0	0	0	0	0	0	0	0	0	0	0	0	0	0	0	0	0	0	0	0	0	0	0	0	0	0	0	0	0	0	0	0	0	0
Silene vulgaris	H		0	0	0	0	0	0	0	0	0	1	0	0	0	0	0	0	0	0	0	0	0	0	0	0	0	0	0	0	0	0	0	0	0	0	0.5	0	0	0	0	0	0	0	0	0	0	0	0
Sonchus arvensis	H		0	0	0	0	0	0	0	0	0	0	0	0	0	0	0	0	0	0	0	0	0	0	0	0	0	0	0	0	0	0	0	0	0	0	0	0	0	0	0	0	0	0	0	0	0	0	0
Taraxacum officinalis	H		0	0	0	0	0	0	0	0	0	0	0	0	0	0	0	0	0	0	0	0	0	0	0	0	0	0	0	0	0	0	0	0	0	0	0	0	0	0	0	0	0	0	0	0	0	0	0
Tetragonolobus maritimus	H		0	0	0	0	0	0	0	0	0	0	0	0	0	0.3	0	0	0	0	0	0	0	0	0	0	0	0	0	0	0	0	0	0	0	0	0	0	0	0	0	0	0	0	0.1	0	0	0	0
Teucrium scordium	H		0	0	0	0	0	0	0	0	0	0	0	0	0	0	0	0	1	0	0	0	0	0	6	0.5	0	0	0	0	1	0	0	0	0	0	0	0	0	0	0	0	0	0	0	0	0	0	0
Thalictrum flavum	H		0	0	0	0	0	0	0	0	0	0	0	0	0	0	0	0	0	0	0	0	0	0	0	0	0	0	0	0	0	0	0	0	0	0	0	0	0	0	0	0	0	0	0	0	0	0	0
Torilis arvensis	Th		0	0	0	0	0	0	0	0	0	0	0	0	0	0	0	0	0	0	0	0	0	0	0	0	0	0	0	0	0	0	0	0	0	0	0	0	0	0	0	0	0	0.7	0.7	0	0	0.3	0
Trifolium campestre	Th		0	0	0	0	0	0	0	0	0	0	0	0	0	0	0	0	0	0	0	0	0	0	0	0	0	0	0	0	0	0	0	0	0	0	0	0	0	0	0	0	0	0	0	0	0	0	0
Trifolium fragiferum	H		0	0	0	0	0	0	0	0	4	0	0	0	0	0	0	0	0	0.5	0	0	0	0	0	0	0	0	0	0	0	0	0	0	0	0	0	0	0	0	0	0	0	0	0	0	0	0	0
Trifolium pratense	H		0	0	0	0	0	0	0	0	0	0	0	0	0	0	0	15	1	0	0	0	0	0	0	0	0	0	0	0	0	0	0	0	0	0	0	0	0	0	0	2	0	20	0	0	0	3	0
Trifolium repens	H		0	0	0	0	0	0	0	0	3	0	0	0	0	0	0	0	3	0	0	0	0	0	0	0	0	0	0	0	0	18	0	0	0	0	0	0	0	0	0	0	0	0	0	0	0	0	0
Trigonella caerulea	Th		0	0	0	0	0	0	0	0	0	0	0	0	0	0	0	0	0	0	0	0	0	0	0	0	0	0	0	0	0	0	0	0	0	0	0	0	0	0	0	0	0	0	0	0	0	0	0
Vicia angustifolia	Th		0	0	0	0.7	0.1	11	0.7	0	0	0	0	0	0	0.5	0.1	0	0	0	0	2	0	0	0	3	0.3	0	0	0	0	0	0	0	0.3	0	0	0	0	0	0	0	0	0	0	0	0	0	0
Vicia cracca	H		0	0	0	0	0.5	0	0	0	0	0	0	0	0	0	0	0	0	0	0	0	0	0	0.1	0	0	0	0	0	0	0	0	0	0	0	0	0	0	0	0	0	0	0	0	0	0	0	0
Vicia hirsuta	Th		0	0.5	0	0	0	0	0	0	0	0	0	0	0	0	0	0	0	0	0	0	0	0	0	0	0	0	0	0	0	0	0	0	0	0	0	0	0	0	0	0	0	0	0	0	0	0	0
Vicia lathyroides	Th		0.3	0	0	0	0	0	0	0	0	0	0	0.1	0	0	0	0	0	0	0	0	0	0	0	0	0	0	0	0	0	0	0	0	0	0	0	0	0	0	0	0	0	0	0	0	0	0	0
	Abbreviations: G– geophyte H– hemicryptophyte Th– therophyte TH– hemitherophyte
[truncated: 146 more columns]

## Sheet: Munka4
Supporting Information to the paper Kelemen, A. et al. Density-dependence of plant-plant interactions triggered by grazing. Journal of Vegetation Science. Appendix S1. Species covers and the numbers of flowering shoots detected in 0.5m × 0.5m plots.
Species:	Cover:	Site1/1	Site1/2	Site1/3	Site1/4	Site1/5	Site1/6	Site1/7	Site1/8	Site1/9	Site1/10	Site1/11	Site1/12	Site1/13	Site1/14	Site1/15	Site1/16	Site1/17	Site1/18	Site1/19	Site1/20	Site1/21	Site1/22	Site1/23	Site1/24	Site1/25	Site1/26	Site1/27	Site1/28	Site1/29	Site1/30	Site1/31	Site1/32	Site2/1	Site2/2	Site2/3	Site2/4	Site2/5	Site2/6	Site2/7	Site2/8	Site2/9	Site2/10	Site2/11	Site2/12	Site2/13	Site2/14	Site2/15	Site2/16
Althaea officinalis		0	0	0	0	0	0	0	0	20	10	10	15	20	18	20	9	50	50	36	35	40	35	50	27	75	70	78	85	90	80	80	88	0	0	0	0	0	0	0	0	17	10	20	10	13	15	16	15
Achillea asplenifolia		3	0	0	0	0	0	0.5	0	0.5	0	4	0	0	0	0	0	0	1	0	0	6	7	4	0.7	0.3	0	0.3	3	0	0	2	4	0	1	0	0	0	17	18	0	2	0	8	0	0	0	0	2
Agropyron repens		25	30	4	20	40	26	35	15	4	10	15	42	42	10	32	40	16	20	5	4	8	3	40	0	8	50	16	8	24	30	5	6	23	60	20	20	50	7	4	80	14	7	20	50	11	20	10	60
Agrostis stolonifera		0	0	0	0	0	0	0	0	2	0	25	0	0	10	0	0	0	0	0	0	8	1	0	0	0	0	0	0	0	0	0	0	0	0	0	10	0	0	0	0	0	0	5	5	0	0	0	0
Alopecurus pratensis		0	0	0	0	0	0	0	0	0	0	0	0	0	0	0	0	0	0	30	50	0	0	0	7	0	0	0	0	1	0	0	0	0	0	0	0	0	0	0	0	0	5	0	0	20	0	0	0
Bolboschoenus maritimus		0	0	0	0	0	0	0	0	0	0	0	0	0	0	0	0	0	0	0	0	0	0	2	0	0	0	0	0	0	0	0	0	0	0	0	0	0	0	0	0	0	0	0	0	0	0	0	0
Calystegia sepium		0	1	0	0	0	0	0	0	0	0	6	0	0	0	5	0	0	0	0	0	0	0	0	0	0	0	0.5	0	0	0	0	0	0	0	0	0	0	0	0	0	0	0	0	0	4	0	0	0
Carex acutiformis		0	0	0	0	0	0	0	0	0	0	0	0	0	0	0	0	0	0	0	0	0	0	0	0	0	0	0	0	0	0	0	0	0	0	2	15	0	0	0	0	0	0	1	0	0	0	0	0
Carex distans		0	0	0	1.5	6	0	0	0	8	0	0	3	9	0	0	3	0.5	5	2	4	0	3	2	0	0	3	0	0	4	2	0	0	5	4	0	0	1	3	0	0	0	0	0	0	0	3	1	0
Carex hirta		0	3	0	0	0	0	0	0	1	0	7	0	0	0	0	4	0	0	0.5	2	0	0	0	0	1	0	0	2	0	0	0	0	0	0	0	0	0	0	0	0	0	0	0	0	0	0	0	0
Carex otrubea		0	0	0	0	0	0	0	0	0	0	0	0	0	0	0	0	0	0	0	0	0	0	0	0	0	0	0	0	0	0	0	0	0	0	0	0	0	0	0	0	0	0	0	0	0	0	0	0
Carex tomentosa		2	2	0	1	0	1	0	0	0	1	1	0	0	1	0	0	3	0	0	0	0	0	0	0	1	0	0	0	0	0	0	0	3	0	0.5	12	0	0	0.5	0	0	0	0	10	0	30	20	0
Centaurea jacea		0	1	0	0	0.3	5	0	15	11	0	3	0	0	1	0	8	8	0	1	2	3	0.7	0	0	0	0	0	0	0	0	0	0	0	0	0	0	0	0	0	0	1.5	0	0	1	0	15	10	3
Cichorium intybus		0	0	0	0	0	0	0	0	0	0	0	0	0	0	0	0	0	0	0	0	0	0	0	0	0	0	0	0	0	0	0	0	0	0	0	0	0	0	0	0	0	0	0	0	0	0	0	0
Cirsium arvense		0	4	2	9	1.5	0	0	0	1	0	0	0	2	1	4	2	0	0	4	4	0	0	0	4	0	0	0	0	4	0	0	0	2	0	0	0	0	0	0	0	0	0	0	0	0	0	0	0
Cirsium brachycephalum		0	0	0	0	0	0	0	0	0	0	0	0	0	0	0	0	0	0	0	0	0	0	0	0.7	0	0	0	0	0	0	0	0	0	0	0	0	0	0	0	1	0	0	0	12	0	0	0	0
Cirsium canum		6	0	0	0	3	0	0	0	0.7	0	0	0	0	0	0	0	0	0	0	0	0	0	0	0	0	0	0	0	0	0	0	0	0	0	0	0	1	0	0	0	28	8	0	0	0	0	0	0
Convolvulus arvensis		8	0	0	1	0	0	0	0	0	0	0	0	0	0	2	0	0	0	0	0	0	0	0	0	0	0	0	0	0	0	0	0	7	0	0	0	0	0	0	0	0	0	1	0	0	0	0	0
Conyza canadensis		0	0	0	0	0	0	0	0	0	0	0	0	0	0	0	0	0	0	0	0	0	0	0	0	0	0	0	0	0	0	0	0	0	0	0	0	0	0	0	0	0	0	0	0	0	0	0	0
Crepis biennis		0	0	0	0	0	0	18	0	0	0	0	0	0	0	0	0	0	4	0	0	0	0	0	0	0	0	0	0	0.7	0	0	0.3	0	0	0.1	0	0	0	0	0	0	0	0	0	0	0	0	0
Cynodon dactylon		0	0	0	0	0	0	0	0	0	0	0	0	0	0	0	0	0	0	0	0	0	0	0	0	0	0	0	0	0	0	10	0	0	0	0	0	0	0	0	0	0	0	0	0	0	0	0	0
Dactylis glomerata		0	0	0	0	0	0	0	20	0	0	0	0	0	0	0	0	0	2	0	0	0	10	0	0	0	0	0	0	0	0	3	0	0	0	18	0	11	4	2	0	10	0	1	0	0	0	0	0
Daucus carotta		0	0	0	0	0	0	0	0	0	0	0	0	0	0	0	0	0	0	0	0	0	0	0	0	0	0	0	0	0	0	0	0	0	0	0	0	0	0	0	0	0	0	0	0	0	0	0	0
Desampsia caespitosa		0	0	0	0	0	0	0	0	0	0	0	0	0	0	0	0	0	0	0	0	0	0	0	0	3	0	0	0	0	0	0	0	0	0	0	0	0	0	0	0	0	0	0	0	0	0	0	0
Epilobium tetragonum		0	0	0	0	0	0	0	0	0	0	0	0	0	0	0	0	0	0	0	0	0	0	2	0	0	0	0	0	0	0	0	0	0	0	0	0	0	0	0	0	0	0	0	0	0	0	0	0
Festuca arundinacea		0	20	0	0	12	0	0	10	0	30	10	0	0	0	8	0	0	0	0	0	10	15	8	0	0	0	0	0	0	0	0	8	0	0	0	0	0	0	18	0	0	0	0	0	0	0	0	0
Festuca pratensis		4	0	21	10	0	0	0	0	35	0	0	0	0	6	0	0	0	20	0	0	0	0	0	41	0	5	20	0	6	0	3	0	0	0	0	10	3	0	0	0	0	0	0	0	0	5	0	5
Galium palustre		0	0	0.1	0	0	0	0	0	0	0	0	0	0	0	0	0	0	0	0	0	0	0	0	0	0.1	0	0	0	0	0	0	0	0	0	0	0	0	0	0	0	0	0	0	0	0	0	0	0
Galium verum		20	7	22	5	25	20	20	20	15	5	2	15	13	8	20	7	2	0	8	0.5	4	5	0	0	2	7	0	1	0	2	0	0	33	10	12	0	30	32	10	0.2	14	25	10	4	0	0	2	1
Holoschoenus romanus		0	0	0	0	0	0	0	0	0	0	5	0	0	0	0	0	0	0	0	0	0	0	0	0	0	0	0	0	0	0	0	0	0	0	0	0	0	0	0	0	0	0	0	0	0	0	0	0
Inula britannica		0.3	0	0	0	0	0	0	3	0	0	0	0	0	0	0	0	0	0	0	0	0	0	0	0	0	0	0	0	0	0	0	0	0	0	0	0	0	0	0	0	0	0	0	0	0	0	15	1
Juncus compressus		0	0	0	0	0	0	0	0	0	0	0	0	0	0	0	0	0.2	0	0	0	0	0	0	0	0	0	0	0	0	0	0	0	0	0	0	0	0	0	0	0	0	0	0	4	0	0	0	0
Juncus effusus		0	0	0	0	0	0	0	0	0	0	0	0	0	0	0	0	0	0	0	0	0	0	0	0	0	0	0	0	0	0	0	0	0	0	0	0	0	0	0	0	0	0	0	0	0	0	0	0
Lactuca saligna		0	0	0	0	0	0	0	0	0	0	0	0	0	0	0	0	0	0	0	0	0	0	0	0	0	0	0	0	0	0	0	0	0	2	0	0	0	0	0	0.5	0	0	0	0	0	0	0	0
Lathyrus pratensis		0	0	0	0	0	0	0	0	0	0	0	0	0	0	0	0	0	0	0	0	0	0	0	0	0	0	0	0	0	0	0	0	0	0	0	0	0	0	0	0	0	9	0	0	0	0	0	0
Lolium perenne		0	0	0	0	0	0	0	0	0	0	0	0	0	0	0	0	0	0	0	0	0	0	0	0	0	0	0	0	0	0	0	0	0	0	0	0	0	0	0	0	0	0	0	0	0	0	0	0
Lotus tenuis		0	0	0	0	0	0	0	0	1.5	5	0	0	0	0	0	0	0	0.7	0	0	1	3	0	0	0	0	0	0	0	0	0.3	0	0	0.5	0	0	0	0	0	0	0	0	0	0	0	0	0	0
Melilotus officinalis		0	0	0	0	0	0	0	0	0	0	0	0	0	0	0	0	0	0	0.3	0	0	0	0	0	0	0	0	0	0	0	0	0	0	0	0	0	0	0	0	0	0	0	0	0	0	0	0	0
Mentha aquatica		0	0	0	0	0	0	0	0	0	0	0	0	0	0	0	0	1	0	0	0	0	0.3	18	2	0	0	0	0	3	6	0	0	0	0	0	0	0	0	0	0	0	0	0	0	0	0	0	0
Pastinaca sativa		2	2	3	20	1	7	4	5	1	1	0.5	2	0	0	0.2	2	0	5	0	0	0	1	0	0	0	3	0	0	0	0	0	0	4	5	3	0	4	9	3	2	4	6	0	0	0	0	0	0
Phalaris arundinacea		0	0	0	0	0	0	0	0	0	0	0	0	0	0	0	0	0	0	0	0	0	0	0	0	0	0	0	0	0	0	0	0	0	0	0	0	0	0	0	0	0	0	0	0	27	0	0	0
Phleum pratense		0	0	0	0	0	0	0	0	0	0	0	0	0	10	0	0	0	0	0	0	0	0	0	0	0	0	0	0	0	0	0	0	0	0	0	0	0	0	0	0	0	0	0	0	0	0	0	0
Plantago lanceolata		0	0	0	0	0	0	0	0	0	0	0	0	0	0	0	2	0	0	0	0	0	0	0	0	0	0	0	0	0	0	0	0	0	0	0	0	0	0	0	0	0	0	0.5	0	0	0	0	0
Plantago major		0	0	0	0	0	0	0	0	0	0	1	0	0	0	0	0	6	0	0	0	0	0	2	0	0	0	0	0	0	3	0	0	0	0	0	0	0	0	0	0	0	0	0	0	0	0	0	0
Poa angustifolia		10	8	50	35	5	10	5	2	7	10	0	1	4	10	3	3	0	15	2	2	8	15	4	1	10	10	0	0	1	1	1	6	5	2	25	5	8	5	20	0	3	0.3	8	0	3	2	4	0
Poa compressa		0	0	0	0	0	0	0	0	0	0	0	0	0	0	0	0	0	0	0	0	0	0	0	0	0	0	0	0	0	0	0	0	0	0	0	0	0	0	0	0	0	0	0	0	0	0	0	4
Potentilla anserina		0	0	0	0	0	0	0	0	0	0	0	0	0	0	0	0	2	0	0	0	0	0	0	0	0	0	0	0	2	0	0	0	0	0	0	0	0	0	0	0	0	0	0	0	0	0	0	0
Potentilla reptans		0	10	2	0	1	0	0	0	0	0	0	2	0	0	3	2	2	0	3	3	0.5	0	3	3	0	0	0	0	4	0	0	0	1.5	5	0.3	10	0	0	0	3	1	3	0	0	2	4	4	0
Ranunculus polyanthemos		0	3	0	0	0	0	0	0	0	0	1	0.3	4	1	0	0	1	0	0	0.3	0	0	0	0	0	0	0.3	0	0	0	0	0	0	0	0	0	0	2	0.3	0	0	0	0	0	0	0	0	0
Ranunculus repens		0	0	0	0	0	0	0	0	0	0	0	0	0	0	0	0	0	0	0	0	0	0	0	0	0	0	0	0	0	2	0	0	0	0	0	0	0	0	0	0	0	0	0	0	0	0	0	0
Serratula tinctoria		0	0	0	1.5	0	12	0	0	7	1	0	10	0	3	0	0	0.5	0	0	0	0	0	0	0	2	8	0	0	0	0	0	0	0	0	0	0	0	0	0	0	0	0	0	0	0	7	0	0
Silene nutans		0	0	0	0	0	0	0	0	0	0	0	0	0	0	0	0	0	0	0	0	0	0	0	0	0	0	0	0	0	0	0	0	0	0	0	0	0	0	0	0	0	0	0	0	0	0	0	0
Silene vulgaris		0	0	0	0	0	0	0	0	0	1	0	0	0	0	0	0	0	0	0	0	0	0	0	0	0	0	0	0	0	0	0	0	0	0	0.5	0	0	0	0	0	0	0	0	0	0	0	0	0
Sonchus arvensis		0	0	0	0	0	0	0	0	0	0	0	0	0	0	0	0	0	0	0	0	0	0	0	0	0	0	0	0	0	0	0	0	0	0	0	0	0	0	0	0	0	0	0	0	0	0	0	0
Taraxacum officinalis		0	0	0	0	0	0	0	0	0	0	0	0	0	0	0	0	0	0	0	0	0	0	0	0	0	0	0	0	0	0	0	0	0	0	0	0	0	0	0	0	0	0	0	0	0	0	0	0
Tetragonolobus maritimus		0	0	0	0	0	0	0	0	0	0	0	0	0	0.3	0	0	0	0	0	0	0	0	0	0	0	0	0	0	0	0	0	0	0	0	0	0	0	0	0	0	0	0	0.1	0	0	0	0	0
Teucrium scordium		0	0	0	0	0	0	0	0	0	0	0	0	0	0	0	0	1	0	0	0	0	0	6	0.5	0	0	0	0	1	0	0	0	0	0	0	0	0	0	0	0	0	0	0	0	0	0	0	0
Thalictrum flavum		0	0	0	0	0	0	0	0	0	0	0	0	0	0	0	0	0	0	0	0	0	0	0	0	0	0	0	0	0	0	0	0	0	0	0	0	0	0	0	0	0	0	0	0	0	0	0	0
Torilis arvensis		0	0	0	0	0	0	0	0	0	0	0	0	0	0	0	0	0	0	0	0	0	0	0	0	0	0	0	0	0	0	0	0	0	0	0	0	0	0	0	0	0	0.7	0.7	0	0	0.3	0	0
Trifolium campestre		0	0	0	0	0	0	0	0	0	0	0	0	0	0	0	0	0	0	0	0	0	0	0	0	0	0	0	0	0	0	0	0	0	0	0	0	0	0	0	0	0	0	0	0	0	0	0	0
Trifolium fragiferum		0	0	0	0	0	0	0	0	4	0	0	0	0	0	0	0	0	0.5	0	0	0	0	0	0	0	0	0	0	0	0	0	0	0	0	0	0	0	0	0	0	0	0	0	0	0	0	0	0
Trifolium pratense		0	0	0	0	0	0	0	0	0	0	0	0	0	0	0	15	1	0	0	0	0	0	0	0	0	0	0	0	0	0	0	0	0	0	0	0	0	0	0	2	0	20	0	0	0	3	0	0
Trifolium repens		0	0	0	0	0	0	0	0	3	0	0	0	0	0	0	0	3	0	0	0	0	0	0	0	0	0	0	0	0	18	0	0	0	0	0	0	0	0	0	0	0	0	0	0	0	0	0	0
Trigonella caerulea		0	0	0	0	0	0	0	0	0	0	0	0	0	0	0	0	0	0	0	0	0	0	0	0	0	0	0	0	0	0	0	0	0	0	0	0	0	0	0	0	0	0	0	0	0	0	0	2
Vicia angustifolia		0	0	0	0.7	0.1	11	0.7	0	0	0	0	0	0	0.5	0.1	0	0	0	0	2	0	0	0	3	0.3	0	0	0	0	0	0	0	0.3	0	0	0	0	0	0	0	0	0	0	0	0	0	0	0
Vicia cracca		0	0	0	0	0.5	0	0	0	0	0	0	0	0	0	0	0	0	0	0	0	0	0	0.1	0	0	0	0	0	0	0	0	0	0	0	0	0	0	0	0	0	0	0	0	0	0	0	0	0
Vicia hirsuta		0	0.5	0	0	0	0	0	0	0	0	0	0	0	0	0	0	0	0	0	0	0	0	0	0	0	0	0	0	0	0	0	0	0	0	0	0	0	0	0	0	0	0	0	0	0	0	0	0
Vicia lathyroides		0.3	0	0	0	0	0	0	0	0	0	0	0.1	0	0	0	0	0	0	0	0	0	0	0	0	0	0	0	0	0	0	0	0	0	0	0	0	0	0	0	0	0	0	0	0	0	0	0	0
[truncated: 145 more columns]
